# Supplementary material
Source: PubMed Central journal article supplement (PMC8082432)
Supplement: jamacardiol-e210852-s001.pdf [file jamacardiol-e210852-s001.pdf]

## Supplemental Online Content

Turagam MK, Musikantow D, Whang W, et al. Assessment of catheter ablation or antiarrhythmic drugs for first-line therapy of atrial fibrillation: a meta-analysis of randomized clinical trials. *JAMA Cardiol*. Published online April 28, 2021. doi:10.1001/jamacardio.2021.0852

eMethods. Study Protocol and Data Collection Form

eReferences

eTable 1. Inclusion and Exclusion Criteria of The Included Studies

eTable 2. Detailed Risk Bias Assessment Of All The Included Trials For Reporting Atrial Arrhythmia Recurrence Using The Cochran Risk Of Bias Tools

eTable 3. Detailed Risk Bias Assessment Of All The Included Trials For Reporting Symptomatic AF Using The Cochran Risk Of Bias Tools

eTable 4. Detailed Risk Bias Assessment Of All The Included Trials For Reporting Hospitalization Using The Cochran Risk Of Bias Tools

eTable 5. Detailed Risk Bias Assessment Of All The Included Trials For Reporting Mortality Using The Cochran Risk Of Bias Tools

eTable 6. Detailed Risk Bias Assessment Of All The Included Trials For Reporting Composite Of Major Adverse Events Using The Cochran Risk Of Bias Tools

eTable 7. Detailed Risk Bias Assessment Of All The Included Trials For Reporting Outcomes Of Additional Ablation Using The Cochran Risk Of Bias Tools

eTable 8. Detailed Risk Bias Assessment Of All The Included Trials For Reporting Outcomes Of Study Cross-Over Using The Cochran Risk Of Bias Tools

eTable 9. Procedure Details Across the Included Trials

eTable 10. Results of The Sensitivity Analysis

eFigure 1. Forest Plot Demonstrating Atrial Arrhythmia Recurrence After Ablation vs AAD at 1-Year Follow Up

eFigure 2. Forest Plot Demonstrating Atrial Arrhythmia Recurrence After Ablation vs AAD at 2-Year Follow Up

eFigure 3. Forest Plot Demonstrating Study Cross-Over After Ablation vs AAD

eFigure 4. Forest Plot Demonstrating Additional Ablation After Ablation vs AAD

This supplemental material has been provided by the authors to give readers additional information about their work.

## **eStudy Protocol**

# **Catheter Ablation or Antiarrhythmic Drugs for First-Line Therapy of Atrial Fibrillation: A Meta-analysis of Randomized Controlled Trials**

### **A. Background & Significance**

Current guidelines recommend maintenance of sinus rhythm with antiarrhythmic drugs (AADs) in patients with symptomatic paroxysmal AF. (1,2) However, paroxysmal AF seldom responds to AADs and is associated with significant toxicity. (3,4) On the other hand, catheter ablation for paroxysmal atrial fibrillation is superior to drug therapy in maintaining freedom from AF and improving quality of life in patients who failed AADs (5,6) Previous randomized controlled trials (RCTs) evaluating ablation as compared with AADs as first-line therapy have used point-by-point radiofrequency (RF) ablation. (7-9) However, those studies failed to demonstrate any difference cardiovascular outcomes and were limited by high rates of AF recurrence, serious adverse events, repeat procedures and cross-over rates.

Recently, AF ablation using single shot using Cryoballoon showed superior efficacy and comparable safety when compared with AADs in patients with paroxysmal AF. (10-12) In addition, the Early Treatment of Atrial Fibrillation for Stroke Prevention Trial (EAST-AFNET 4) showed that early rhythm control resulted in better cardiovascular outcomes including stroke than rate control perhaps suggesting that rhythm control with catheter ablation if performed safely may be superior as a first-line treatment for patients with AF. (13) Although, controversy exists there are several findings that justify use of catheter ablation as first-line therapy in patients with paroxysmal AF. To understand this further, we propose this study which is a pooled analysis of all the randomized studies comparing the safety and efficacy of catheter ablation (both RF and cryo) versus AADs as first-line therapy in patients with paroxysmal AF.

### **B. Objectives and Specific Aims**

The objective of this study is to perform a metaanalysis of randomized clinical trials (RCTs) comparing catheter ablation (CA) to antiarrhythmic drugs (AAD) as first-line therapy in patients with symptomatic paroxysmal atrial fibrillation (AF).

**Specific Aim 1:** To estimate the effectiveness of catheter ablation vs. AADs as first-line therapy for freedom from recurrent symptomatic or asymptomatic atrial arrhythmias.

**Specific Aim 2:** To estimate (i) hospitalization rates, (ii) the proportion of cross-over to the alternative therapy, (iii) additional ablation after the initial therapy with either catheter ablation or AADs had failed and (iv) major adverse events including mortality between catheter ablation vs. AADs in patients with paroxysmal AF.

## **C. Research Design and Methods**

### **(i) Search Strategy**

An extensive search will be conducted in PubMed, Scopus, Google Scholar, and various major scientific conference sessions including abstracts published at the American College of Cardiology, American heart association, European Society of Cardiology Congress, European Heart Rhythm Association Scientific Session and Heart Rhythm Society to identify clinical trials of interest. The search will be conducted by two investigators and will not have date or language restrictions. Two investigators (MT and DM) independently performed searches which included the following keywords: ‘atrial fibrillation’, ‘ablation’, ‘antiarrhythmic’, and ‘random\*’. Information on unpublished studies were obtained from clinicaltrials.gov and Google.

### **(ii) Study Selection & Outcomes**

Study eligibility criteria will include the following:

1. Prospective randomized controlled trials (RCTs) with at least 12 months of follow up.
2. Studies comparing AF ablation versus AADs as initial therapy in patients with symptomatic AF.
3. Studies that included human subject aged  $\geq 18$  years
4. Studies that examined clinical outcomes including – (i) Freedom from atrial arrhythmias, (ii) AF recurrence, (iii) Major adverse events and (iv) Mortality.
5. Published in English language.

### **Clinical Outcomes**

1. The primary outcome of this analysis was recurrence of any atrial arrhythmia (both symptomatic and asymptomatic) including AF, atrial flutter, or atrial tachycardia.
2. Secondary outcome of interest was the following: (i) Symptomatic atrial arrhythmias, (ii) Hospitalizations, (iii) Additional ablation after failed initial treatment with either catheter ablation or AADs, (iv) trial cross-over to alternate therapy, (v) composite of serious adverse events and (vi) mortality.
3. Serious adverse events included a composite of vascular complications (femoral bleeding, hematoma, pseudoaneurysm and groin infection), pericardial effusion (with and without tamponade), pulmonary vein stenosis, phrenic palsy, systemic thromboembolism, symptomatic bradycardia, syncope, and atrial flutter with 1:1 conduction.

### **(iii) Data Extraction**

Two investigators will independently perform the literature search and screen relevant studies & published abstracts that meet study inclusion/exclusion criteria. All the studies that meet study criteria based on the title/abstract will be reviewed in detail and final selection will be made. The data will be extracted using a standardized data collection form. Any discrepancies between the two investigators will be resolved with consultation with the senior investigator.

### **D. Data Synthesis**

Risk ratios will be used to pool differences in binary events, and mean differences to pool differences in continuous outcomes. Summary estimates and 95% confidence intervals (CI) will be reported. Mantel-Haenszel risk ratio (RR) random effects model (DerSimonian and Laird method), Freedman-Tukey double arcsine transformation or random-effects model with the Paule-Mandel method will be used to pool data as appropriate. The Hartung-Knapp small-sample adjustment was used as the number of studies is less than 10. (14) Sensitivity analyses will be performed when appropriate to assess the contribution of each study to the pooled estimate. Heterogeneity of effects among the included studies will be assessed by Higgins I-squared (I<sup>2</sup>)

statistic. All analyses will be were conducted using StataCorp and RevMan 5.3. All p values were 2-sided, and p value of <0.05 was considered significant.

## E. References

1. Hindricks G, Potpara T, Dagres N et al. 2020 ESC Guidelines for the diagnosis and management of atrial fibrillation developed in collaboration with the European Association of Cardio-Thoracic Surgery (EACTS). *European heart journal* 2020.
2. January CT, Wann LS, Calkins H et al. 2019 AHA/ACC/HRS Focused Update of the 2014 AHA/ACC/HRS Guideline for the Management of Patients With Atrial Fibrillation: A Report of the American College of Cardiology/American Heart Association Task Force on Clinical Practice Guidelines and the Heart Rhythm Society in Collaboration With the Society of Thoracic Surgeons. *Circulation* 2019;140:e125-e151.
3. Roy D, Talajic M, Dorian P et al. Amiodarone to prevent recurrence of atrial fibrillation. Canadian Trial of Atrial Fibrillation Investigators. *The New England journal of medicine* 2000;342:913-20.
4. Doyle JF, Ho KM. Benefits and risks of long-term amiodarone therapy for persistent atrial fibrillation: a meta-analysis. *Mayo Clinic proceedings* 2009;84:234-42.
5. Khan AR, Khan S, Sheikh MA, Khuder S, Grubb B, Moukarbel GV. Catheter ablation and antiarrhythmic drug therapy as first- or second-line therapy in the management of atrial fibrillation: systematic review and meta-analysis. *Circulation Arrhythmia and electrophysiology* 2014;7:853-60.
6. Packer DL, Mark DB, Robb RA et al. Effect of Catheter Ablation vs Antiarrhythmic Drug Therapy on Mortality, Stroke, Bleeding, and Cardiac Arrest Among Patients With Atrial Fibrillation: The CABANA Randomized Clinical Trial. *Jama* 2019;321:1261-1274.
7. Wazni OM, Marrouche NF, Martin DO et al. Radiofrequency ablation vs antiarrhythmic drugs as first-line treatment of symptomatic atrial fibrillation: a randomized trial. *Jama* 2005;293:2634-40.
8. Cosedis Nielsen J, Johannessen A, Raatikainen P et al. Radiofrequency ablation as initial therapy in paroxysmal atrial fibrillation. *The New England journal of medicine* 2012;367:1587-95.
9. Morillo CA, Verma A, Connolly SJ et al. Radiofrequency ablation vs antiarrhythmic drugs as first-line treatment of paroxysmal atrial fibrillation (RAAFT-2): a randomized trial. *Jama* 2014;311:692-700.
10. Wazni OM, Dandamudi G, Sood N et al. Cryoballoon Ablation as Initial Therapy for Atrial Fibrillation. *The New England journal of medicine* 2020.
11. Andrade JG, Wells GA, Deyell MW et al. Cryoablation or Drug Therapy for Initial Treatment of Atrial Fibrillation. *The New England journal of medicine* 2020.
12. Velagic V, Pavlovic N, Chierchia G-B et al. Abstract 13915: Cryoballoon Catheter Ablation versus Antiarrhythmic Drug as a First-Line Therapy for Patients With Paroxysmal Atrial Fibrillation: Results of the Cryo-FIRST Study. *Circulation* 2020;142:A13915-A13915.

13. Kirchhof P, Camm AJ, Goette A et al. Early Rhythm-Control Therapy in Patients with Atrial Fibrillation. *The New England journal of medicine* 2020;383:1305-1316.
14. Hartung J KG SB. *Statistical Meta-Analysis with Applications*. Wiley & Blackwell 2008.





- |                                                              |     |    |
|--------------------------------------------------------------|-----|----|
| <b>12. How was randomization conducted?</b>                  | Yes | No |
| <b>13. Was allocation concealed:</b>                         | Yes | No |
| <b>14. Was there blinding during randomization:</b>          | Yes | No |
| <b>15. Was there blinding during outcome assessment:</b>     | Yes | No |
| <b>16. Was there a study run-in period:</b>                  | Yes | No |
| <b>17. Was there an intention to treat analysis:</b>         | Yes | No |
| <b>18. Were there any major study methodological issues:</b> |     |    |

**Please specify:**

### Patient demographics, procedure characteristics and outcomes of the included trials

|                                                                                                                          | Catheter Ablation | Drug therapy |
|--------------------------------------------------------------------------------------------------------------------------|-------------------|--------------|
| Year of publication                                                                                                      |                   |              |
| Funding source                                                                                                           |                   |              |
| Age (years)                                                                                                              |                   |              |
| Patients Screened                                                                                                        |                   |              |
| Patients enrolled                                                                                                        |                   |              |
| Randomization                                                                                                            |                   |              |
| Period of pharmacological optimization                                                                                   |                   |              |
| Blinding adjudication                                                                                                    |                   |              |
| Primary Endpoint                                                                                                         |                   |              |
| Cross over to ablation (%)                                                                                               |                   |              |
| Cross over to drug therapy (%)                                                                                           |                   |              |
| Total Follow up (Months)                                                                                                 |                   |              |
| Type of medications (catheter ablation/<br>medical therapy) (%)<br>Class I AADs<br>Class III AADs<br>Oral anticoagulants |                   |              |
| Paroxysmal AF (%)                                                                                                        |                   |              |
| Time since AF diagnosis (years)                                                                                          |                   |              |
| NYHA class<br>I<br>II<br>III<br>IV                                                                                       |                   |              |
| Baseline LA diameter (mean±SD)                                                                                           |                   |              |

|                                                                                             |  |  |
|---------------------------------------------------------------------------------------------|--|--|
| Baseline LVEF (%) (mean±SD)                                                                 |  |  |
| Frequency of monitoring (months)                                                            |  |  |
| Monitoring modality                                                                         |  |  |
| Ablation strategy                                                                           |  |  |
| Ablation success with one procedure (%)                                                     |  |  |
| Freedom from atrial arrhythmias in catheter ablation group on follow up (%)                 |  |  |
| Freedom from atrial arrhythmias in the drug therapy group on follow up (%)                  |  |  |
| Freedom from symptomatic atrial arrhythmias in the catheter ablation group on follow up (%) |  |  |
| Freedom from symptomatic atrial arrhythmias in the AAD group on follow up (%)               |  |  |
| Complications (%)                                                                           |  |  |
| Mortality (%)                                                                               |  |  |

**eTable 1. Inclusion and Exclusion Criteria of The Included Studies**

| Study             | Inclusion Criteria                                                                                                                                                                                             | Exclusion criteria                                                                                                                                                                                                                                                                                                                                                                                                         |
|-------------------|----------------------------------------------------------------------------------------------------------------------------------------------------------------------------------------------------------------|----------------------------------------------------------------------------------------------------------------------------------------------------------------------------------------------------------------------------------------------------------------------------------------------------------------------------------------------------------------------------------------------------------------------------|
| <b>RAAFT-1</b>    | <ul style="list-style-type: none"> <li>• Monthly symptomatic paroxysmal AF <math>\geq</math>3 months</li> </ul>                                                                                                | <ul style="list-style-type: none"> <li>• &lt;18 years and &gt;75 years</li> <li>• Prior AF/AFL ablation</li> <li>• Prior cardiac surgery</li> <li>• Prior treatment with AADs</li> <li>• Contraindication to long-term OAC</li> </ul>                                                                                                                                                                                      |
| <b>MANTRA-PAF</b> | <ul style="list-style-type: none"> <li>• <math>\geq</math>2 episodes of symptomatic paroxysmal AF within 6 months</li> </ul>                                                                                   | <ul style="list-style-type: none"> <li>• AF lasting &gt;7 days</li> <li>• Age &gt; 70 years</li> <li>• Prior treatment with class IC or III AADs</li> <li>• Prior AF ablation</li> <li>• LA diameter &gt; 5cm</li> <li>• LVEF&lt;40%</li> <li>• Contraindication to long-term OAC</li> <li>• Moderate-severe mitral valve disease</li> <li>• NYHA class <math>\geq</math> III</li> <li>• Secondary cause for AF</li> </ul> |
| <b>RAAFT-2</b>    | <ul style="list-style-type: none"> <li>• Symptomatic paroxysmal AF lasting &gt;30s but <math>\leq</math>4 episodes in prior 6 months</li> <li>• Age&gt;18 and &lt;75 years</li> <li>• No prior AADs</li> </ul> | <ul style="list-style-type: none"> <li>• LA diameter &gt; 5.5 cm</li> <li>• LVEF&lt;40%</li> <li>• Moderate to severe LVH (&gt;1.5 cm)</li> <li>• Valvular disease, coronary disease, or post-cardiac surgery within 6 months</li> <li>• Prior AF ablation</li> <li>• Contraindications to oral anticoagulation</li> <li>• Severe pulmonary disease</li> <li>• Prior pacemaker/ICD</li> </ul>                              |

|                   |                                                                                                                                                                                                                                      |                                                                                                                                                                                                                                                                                                                                                                                                                                                                                          |
|-------------------|--------------------------------------------------------------------------------------------------------------------------------------------------------------------------------------------------------------------------------------|------------------------------------------------------------------------------------------------------------------------------------------------------------------------------------------------------------------------------------------------------------------------------------------------------------------------------------------------------------------------------------------------------------------------------------------------------------------------------------------|
|                   |                                                                                                                                                                                                                                      | <ul style="list-style-type: none"> <li>• Expected survival &lt;1 year</li> </ul>                                                                                                                                                                                                                                                                                                                                                                                                         |
| <b>STOP AF</b>    | <ul style="list-style-type: none"> <li>• Symptomatic paroxysmal AF</li> <li>• Age ≥18 and &lt;80 years</li> <li>• EKG documentation of AF 6 months prior to enrollment</li> </ul>                                                    | <ul style="list-style-type: none"> <li>• Prior class I or III AADs for ≥7 days</li> <li>• LA diameter &gt; 5 cm</li> <li>• Previous AF ablation</li> <li>• Previous LA surgical procedure</li> <li>• Prior persistent AF</li> <li>• NYHA class &gt;III and/or LVEF&lt;45%</li> <li>• Prior stroke/TIA within 6 months</li> <li>• Hypertrophic cardiomyopathy</li> <li>• Any cardiac surgery, MI, PCI within 3 months</li> <li>• Moderate-severe mitral stenosis/regurgitation</li> </ul> |
| <b>EARLY AF</b>   | <ul style="list-style-type: none"> <li>• Non-permanent symptomatic AF within the last 24 months (episodes of AF must be &gt;30)</li> <li>• Age ≥18 years</li> </ul>                                                                  | <ul style="list-style-type: none"> <li>• Daily use of class I or III AADs at sufficient doses (flecainide &gt;50 mg BID, sotalol &gt;80 mg BID, propafenone &gt;150 mg BID, or dronedarone 40 mg BID)</li> <li>• Prior LA ablation</li> <li>• LA diameter &gt;5.5 cm</li> <li>• LVEF&lt;35%</li> <li>• Prosthetic valves</li> <li>• MI, PCI or cardiac surgery within 3 months</li> <li>• NYHA class ≥III</li> <li>• Severe LVH &gt;1.8 cm</li> </ul>                                    |
| <b>CRYO-FIRST</b> | <ul style="list-style-type: none"> <li>• Symptomatic paroxysmal atrial fibrillation (&lt;7 days) including ≥ 2 symptomatic episodes (past 6 month) and ≥ 1 documented AF episode (past 1 year)</li> <li>• Age 18-75 years</li> </ul> | <ul style="list-style-type: none"> <li>• Persistent AF/AFL</li> <li>• Prior Class I or III AAD treatment</li> <li>• Left atrial ablation</li> <li>• Permanent pacemaker</li> <li>• Prior cardiac surgery</li> </ul>                                                                                                                                                                                                                                                                      |

|  |                                                                                                                                                                                                                                                               |                                                                                                                |
|--|---------------------------------------------------------------------------------------------------------------------------------------------------------------------------------------------------------------------------------------------------------------|----------------------------------------------------------------------------------------------------------------|
|  | <ul style="list-style-type: none"><li>• Structurally normal heart (LVEF <math>\geq</math> 50%; IV septum <math>\leq</math>12mm; LVD &lt; 46mm)</li><li>• Normal ECG (QRS width <math>\leq</math> 120mm; QTc &lt; 440ms; PQ <math>\leq</math> 210ms)</li></ul> | <ul style="list-style-type: none"><li>• Prior TIA or stroke</li><li>• NYHA class <math>\geq</math>II</li></ul> |
|--|---------------------------------------------------------------------------------------------------------------------------------------------------------------------------------------------------------------------------------------------------------------|----------------------------------------------------------------------------------------------------------------|

**eTable 2. Detailed Risk Bias Assessment Of All The Included Trials For Reporting Atrial Arrhythmia Recurrence Using The Cochran Risk Of Bias Tools**

| <b>Bias Type</b>                       | <b>RAAFT-1</b> | <b>MANTRA-PAF</b> | <b>RAAFT-2</b> | <b>STOPAF</b> | <b>EARLY AF</b> | <b>CRYO-FIRST</b> |
|----------------------------------------|----------------|-------------------|----------------|---------------|-----------------|-------------------|
| <b>Selection Bias</b>                  |                |                   |                |               |                 |                   |
| Random sequence generation             | Low risk       | Low risk          | Low risk       | Low risk      | Low risk        | Low risk          |
| Allocation concealment                 | Unclear risk   | Unclear risk      | Unclear risk   | Unclear risk  | Unclear risk    | Unclear risk      |
| <b>Performance Bias</b>                |                |                   |                |               |                 |                   |
| Blinding of participants and personnel | High risk      | High risk         | High risk      | High risk     | High risk       | High risk         |
| <b>Detection Bias</b>                  |                |                   |                |               |                 |                   |
| Blinding of outcome assessment         | High risk      | Unclear risk      | Unclear risk   | Unclear risk  | Unclear risk    | Unclear risk      |
| <b>Attrition Bias</b>                  |                |                   |                |               |                 |                   |
| Incomplete outcome data                | Low risk       | Low risk          | Low risk       | Low risk      | Low risk        | Low risk          |
| <b>Reporting Bias</b>                  |                |                   |                |               |                 |                   |
| Selective reporting                    | Low risk       | Low risk          | Low risk       | Low risk      | Low risk        | Low risk          |

**eTable 3. Detailed Risk Bias Assessment of All The Included Trials For Reporting Symptomatic Atrial Arrhythmias Using The Cochran Risk Of Bias Tools**

| Bias Type                              | RAAFT-1      | MANTRA-PAF   | RAAFT-2      | EARLY AF     |
|----------------------------------------|--------------|--------------|--------------|--------------|
| <b>Selection Bias</b>                  |              |              |              |              |
| Random sequence generation             | Low risk     | Low risk     | Low risk     | Low risk     |
| Allocation concealment                 | Unclear risk | Unclear risk | Unclear risk | Unclear risk |
| <b>Performance Bias</b>                |              |              |              |              |
| Blinding of participants and personnel | High risk    | High risk    | High risk    | High risk    |
| <b>Detection Bias</b>                  |              |              |              |              |
| Blinding of outcome assessment         | High risk    | Unclear risk | Unclear risk | Unclear risk |
| <b>Attrition Bias</b>                  |              |              |              |              |
| Incomplete outcome data                | Low risk     | Low risk     | Low risk     | Low risk     |
| <b>Reporting Bias</b>                  |              |              |              |              |
| Selective reporting                    | Unclear risk | Unclear risk | Unclear risk | Unclear risk |



**eTable 4. Detailed Risk Bias Assessment of All the Included Trials For Reporting Hospitalization Using The Cochran Risk Of Bias Tools**

| Bias Type                              | RAAFT-1      | MANTRA-PAF   | STOPAF       |
|----------------------------------------|--------------|--------------|--------------|
| <b>Selection Bias</b>                  |              |              |              |
| Random sequence generation             | Low risk     | Low risk     | Low risk     |
| Allocation concealment                 | Unclear risk | Unclear risk | Unclear risk |
| <b>Performance Bias</b>                |              |              |              |
| Blinding of participants and personnel | High risk    | High risk    | High risk    |
| <b>Detection Bias</b>                  |              |              |              |
| Blinding of outcome assessment         | High risk    | Unclear risk | Unclear risk |
| <b>Attrition Bias</b>                  |              |              |              |
| Incomplete outcome data                | Low risk     | Low risk     | Low risk     |
| <b>Reporting Bias</b>                  |              |              |              |
| Selective reporting                    | Low risk     | Low risk     | Low risk     |

**eTable 5. Detailed Risk Bias Assessment of All The Included Trials For Reporting Mortality Using The Cochran Risk Of Bias Tools**

| Bias Type                              | MANTRA-PAF   | RAAFT-2      | STOPAF       | EARLY AF     | CRYO-FIRST   |
|----------------------------------------|--------------|--------------|--------------|--------------|--------------|
| <b>Selection Bias</b>                  |              |              |              |              |              |
| Random sequence generation             | Low risk     |
| Allocation concealment                 | Unclear risk |
| <b>Performance Bias</b>                |              |              |              |              |              |
| Blinding of participants and personnel | High risk    |
| <b>Detection Bias</b>                  |              |              |              |              |              |
| Blinding of outcome assessment         | Unclear risk |
| <b>Attrition Bias</b>                  |              |              |              |              |              |
| Incomplete outcome data                | Low risk     |
| <b>Reporting Bias</b>                  |              |              |              |              |              |
| Selective reporting                    | Low risk     |

**eTable 6. Detailed Risk Bias Assessment of All the Included Trials For Reporting Composite Of Major Adverse Events Using The Cochran Risk Of Bias Tools**

| Bias Type                              | RAAFT-1      | MANTRA-PAF   | RAAFT-2      | STOPAF       | EARLY AF     | CRYO-FIRST   |
|----------------------------------------|--------------|--------------|--------------|--------------|--------------|--------------|
| <b>Selection Bias</b>                  |              |              |              |              |              |              |
| Random sequence generation             | Low risk     |
| Allocation concealment                 | Unclear risk |
| <b>Performance Bias</b>                |              |              |              |              |              |              |
| Blinding of participants and personnel | High risk    |
| <b>Detection Bias</b>                  |              |              |              |              |              |              |
| Blinding of outcome assessment         | High risk    | Unclear risk | Unclear risk | Unclear risk | Unclear risk | Unclear risk |
| <b>Attrition Bias</b>                  |              |              |              |              |              |              |
| Incomplete outcome data                | Low risk     |
| <b>Reporting Bias</b>                  |              |              |              |              |              |              |
| Selective reporting                    | Low risk     |

**eTable 7. Detailed Risk Bias Assessment of All the Included Trials For Reporting Outcomes Of Additional Ablation Using The Cochran Risk Of Bias Tools**

| Bias Type                              | RAAFT-1      | MANTRA-PAF   | RAAFT-2      | STOPAF       | EARLY AF     | CRYO-FIRST   |
|----------------------------------------|--------------|--------------|--------------|--------------|--------------|--------------|
| <b>Selection Bias</b>                  |              |              |              |              |              |              |
| Random sequence generation             | Low risk     |
| Allocation concealment                 | Unclear risk |
| <b>Performance Bias</b>                |              |              |              |              |              |              |
| Blinding of participants and personnel | High risk    |
| <b>Detection Bias</b>                  |              |              |              |              |              |              |
| Blinding of outcome assessment         | High risk    | Unclear risk | Unclear risk | Unclear risk | Unclear risk | Unclear risk |
| <b>Attrition Bias</b>                  |              |              |              |              |              |              |
| Incomplete outcome data                | Low risk     |
| <b>Reporting Bias</b>                  |              |              |              |              |              |              |
| Selective reporting                    | Low risk     |

**eTable 8. Detailed Risk Bias Assessment of All the Included Trials For Reporting Outcomes Of Study Cross-Over Using The Cochran Risk Of Bias Tools**

| <b>Bias Type</b>                       | <b><i>RAAFT-1</i></b> | <b><i>MANTRA-PAF</i></b> | <b><i>RAAFT-2</i></b> | <b><i>STOPAF</i></b> | <b><i>EARLY AF</i></b> | <b><i>CRYO-FIRST</i></b> |
|----------------------------------------|-----------------------|--------------------------|-----------------------|----------------------|------------------------|--------------------------|
| <b>Selection Bias</b>                  |                       |                          |                       |                      |                        |                          |
| Random sequence generation             | Low risk              | Low risk                 | Low risk              | Low risk             | Low risk               | Low risk                 |
| Allocation concealment                 | Unclear risk          | Unclear risk             | Unclear risk          | Unclear risk         | Unclear risk           | Unclear risk             |
| <b>Performance Bias</b>                |                       |                          |                       |                      |                        |                          |
| Blinding of participants and personnel | High risk             | High risk                | High risk             | High risk            | High risk              | High risk                |
| <b>Detection Bias</b>                  |                       |                          |                       |                      |                        |                          |
| Blinding of outcome assessment         | High risk             | Unclear risk             | Unclear risk          | Unclear risk         | Unclear risk           | Unclear risk             |
| <b>Attrition Bias</b>                  |                       |                          |                       |                      |                        |                          |
| Incomplete outcome data                | Low risk              | Low risk                 | Low risk              | Low risk             | Low risk               | Low risk                 |
| <b>Reporting Bias</b>                  |                       |                          |                       |                      |                        |                          |
| Selective reporting                    | Low risk              | Low risk                 | Low risk              | Low risk             | Low risk               | Low risk                 |

**eTable 9. Procedure Details Across the Included Trials**

| <b>Study</b>      | <b>Ablation Energy</b> | <b>Ablation catheter</b>                               | <b>Type of ablation</b>               | <b>Anticoagulation after ablation</b> | <b>Class I/III AADs post-ablation</b> | <b>Blanking period</b> |
|-------------------|------------------------|--------------------------------------------------------|---------------------------------------|---------------------------------------|---------------------------------------|------------------------|
| <b>RAAFT-1</b>    | RF                     | 8 mm (Biosense Webster)                                | PVI                                   | Warfarin for at least 3 months        | None                                  | 2 months               |
| <b>RAAFT-2</b>    | RF                     | N/R                                                    | PVI, Additional ablation*             | Warfarin for at least 3 months        | Allowed for 3 months                  | 3 months               |
| <b>MANTRA PAF</b> | RF                     | 8 mm (Navistar DS) or 3.5 mm irrigated (Thermocool)    | PVI, Additional ablation <sup>v</sup> | Warfarin for whole study period       | Allowed for 3 months                  | 3 months               |
| <b>STOP AF</b>    | Cryo                   | Cryoballoon (Arctic front)                             | PVI                                   | Warfarin/NOAC for at least 2 months   | Allowed <sup>+</sup> for 80 days      | 3 months               |
| <b>EARLY AF</b>   | Cryo                   | Cryoballoon (Arctic front), Cryocatheter (Freezor Max) | PVI±CTI <sup>^</sup>                  | Warfarin/NOAC                         | None                                  | 3 months               |
| <b>CRYO-FIRST</b> | Cryo                   | Cryoballoon (Arctic front)                             | PVI                                   | N/R                                   | N/R                                   | 3 months               |

<sup>^</sup> In the event of documented right atrial flutter with a RF or Cryoablation; \*linear ablation lesions, ablation targeting common fractionated atrial electrograms, superior vena cava isolation, ganglion plexi ablation and Cavotricuspid isthmus ablation; <sup>v</sup> linear ablation lesions along the roof, mitral and CTI ablation. ; <sup>+</sup>excluding amiodarone; N/R: Not reported

**eTable 10. Results of The Sensitivity Analysis**

| <b>Study Excluded</b>                   | <b>Risk Ratios</b> | <b>95% Confidence Intervals</b> | <b>p-value</b> | <b>I<sup>2</sup></b> |
|-----------------------------------------|--------------------|---------------------------------|----------------|----------------------|
| <b>Recurrence of Atrial Arrhythmias</b> |                    |                                 |                |                      |
| <i>RAAFT-1</i>                          | 0.65               | 0.57 to 0.74                    | <0.00001       | 0%                   |
| <i>RAAFT-2</i>                          | 0.58               | 0.48 to 0.71                    | <0.00001       | 33%                  |
| <i>MANTRA PAF</i>                       | 0.59               | 0.46 to 0.76                    | <0.00001       | 53%                  |
| <i>STOP AF</i>                          | 0.62               | 0.50 to 0.76                    | <0.00001       | 51%                  |
| <i>EARLY AF</i>                         | 0.60               | 0.46 to 0.78                    | 0.0001         | 53%                  |
| <i>CRYO-FIRST</i>                       | 0.62               | 0.50 to 0.77                    | <0.00001       | 50%                  |
| <b>Symptomatic atrial arrhythmias</b>   |                    |                                 |                |                      |
| <i>RAAFT-1</i>                          | 0.52               | 0.35 to 0.79                    | 0.002          | 32%                  |
| <i>RAAFT-2</i>                          | 0.37               | 0.25 to 0.55                    | <0.00001       | 1%                   |
| <i>MANTRA PAF</i>                       | 0.44               | 0.22 to 0.86                    | 0.02           | 69%                  |
| <i>EARLY AF</i>                         | 0.43               | 0.21 to 0.92                    | 0.03           | 69%                  |
| <b>Hospitalization</b>                  |                    |                                 |                |                      |
| <i>RAAFT-1</i>                          | 0.38               | 0.21 to 0.67                    | 0.0009         | 0%                   |
| <i>MANTRA PAF</i>                       | 0.30               | 0.14 to 0.63                    | 0.001          | 38%                  |
| <i>STOP AF</i>                          | 0.18               | 0.06 to 0.50                    | 0.001          | 0%                   |
| <b>Additional Ablation</b>              |                    |                                 |                |                      |
| <i>RAAFT-1</i>                          | 0.54               | 0.18 to 1.6                     | 0.28           | 91%                  |
| <i>RAAFT-2</i>                          | 0.69               | 0.17 to 2.75                    | 0.60           | 89%                  |
| <i>MANTRA PAF</i>                       | 0.32               | 0.19 to 0.55                    | <0.0001        | 0%                   |
| <i>STOP AF</i>                          | 0.54               | 0.18 to 1.65                    | 0.28           | 91%                  |
| <i>EARLY AF</i>                         | 0.54               | 0.18 to 1.65                    | 0.28           | 91%                  |
| <i>CRYO-FIRST</i>                       | 0.67               | 0.17 to 2.6                     | 0.57           | 93%                  |
| <b>Cross-over</b>                       |                    |                                 |                |                      |
| <i>RAAFT-1</i>                          | 0.21               | 0.13 to 0.35                    | <0.00001       | 6%                   |
| <i>RAAFT-2</i>                          | 0.15               | 0.04 to 0.63                    | 0.009          | 54%                  |
| <i>MANTRA PAF</i>                       | 0.14               | 0.04 to 0.52                    | 0.003          | 42%                  |
| <i>STOP AF</i>                          | 0.21               | 0.13 to 0.35                    | <0.00001       | 6%                   |
| <i>EARLY AF</i>                         | 0.21               | 0.13 to 0.35                    | <0.00001       | 6%                   |
| <i>CRYO-FIRST</i>                       | 0.23               | 0.15 to 0.37                    | <0.00001       | 0%                   |
| <b>Major Adverse Events</b>             |                    |                                 |                |                      |
| <i>RAAFT-1</i>                          | 1.70               | 0.86 to 3.34                    | 0.12           | 0%                   |
| <i>RAAFT-2</i>                          | 1.38               | 0.63 to 3.05                    | 0.42           | 15%                  |
| <i>MANTRA PAF</i>                       | 1.40               | 0.60 to 3.30                    | 0.44           | 17%                  |
| <i>STOP AF</i>                          | 1.73               | 0.90 to 3.34                    | 0.10           | 0%                   |
| <i>EARLY AF</i>                         | 1.24               | 0.60 to 2.55                    | 0.56           | 0%                   |
| <i>CRYO-FIRST</i>                       | 1.52               | 0.81 to 2.85                    | 0.19           | 0%                   |

**eFigure 1. Forest Plot Demonstrating Atrial Arrhythmia Recurrence After Ablation vs AAD at 1-Year Follow Up**

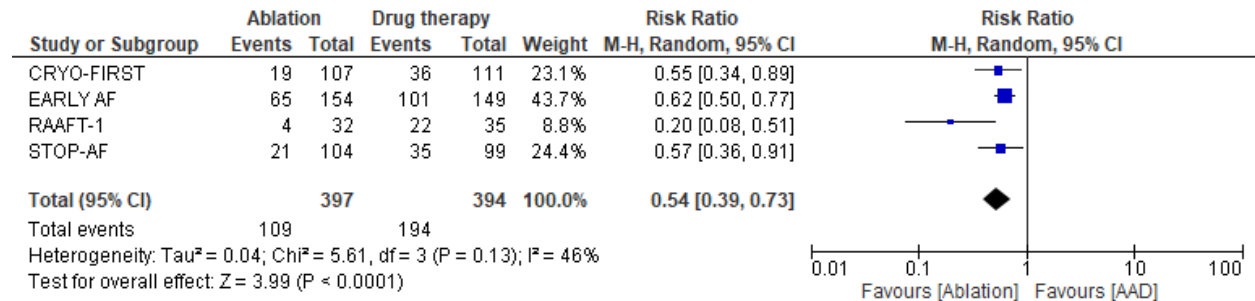

**eFigure 2. Forest Plot Demonstrating Atrial Arrhythmia Recurrence After Ablation vs AAD at 2-Year Follow Up**

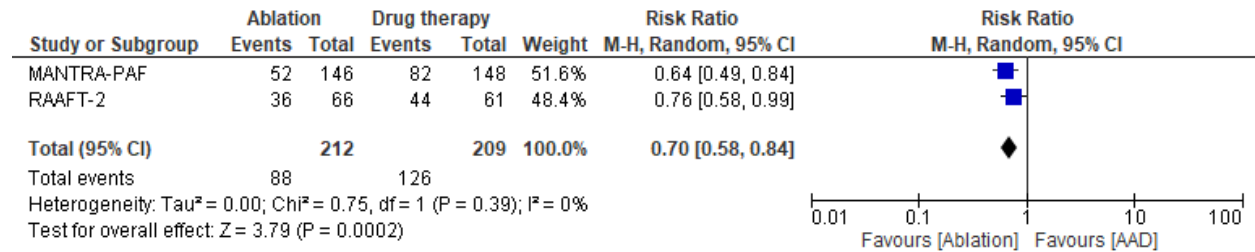



**eFigure 3. Forest Plot Demonstrating Study Cross-Over After Ablation vs AAD**

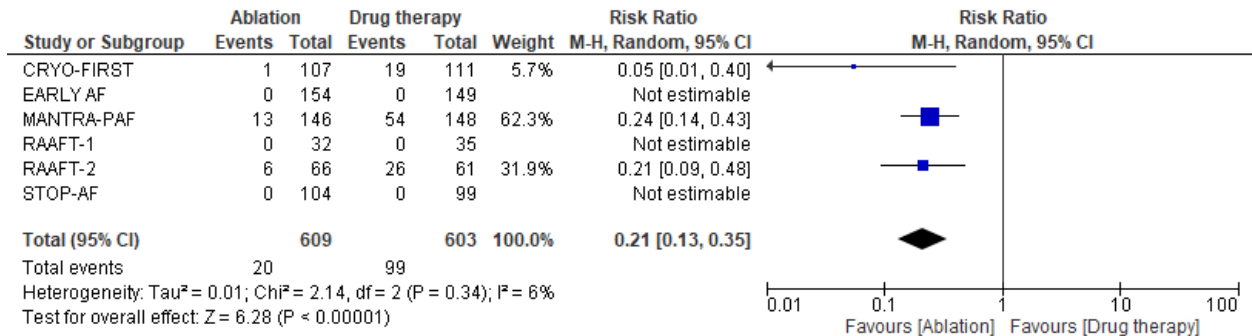

**eFigure 4. Forest Plot Demonstrating Additional Ablation After Ablation vs AAD**

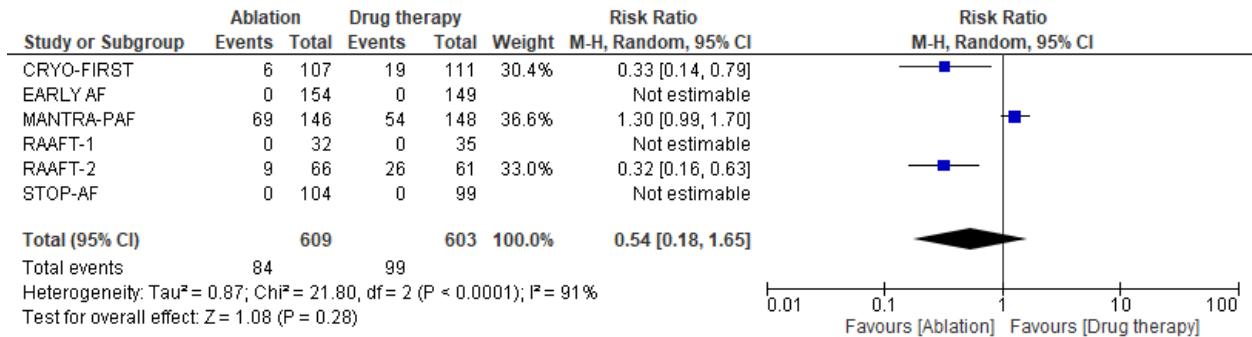

CRYO-FIRST: 4 ablations during blanking period and 2 ablations after blanking period; RAAFT-2: 1 ablation during blanking period and 8 after blanking period.
